# Supplementary material for: Prevalence, indications and neonatal complications of caesarean deliveries in Cameroon: a systematic review and meta-analysis
Source: PubMed Central journal article supplement (PMC7268214; doi:10.1186/s13690-020-00430-1), 2020-06-03

### Meta-analysis showing the proportion of caesarean deliveries due to cephalopelvic disproportions

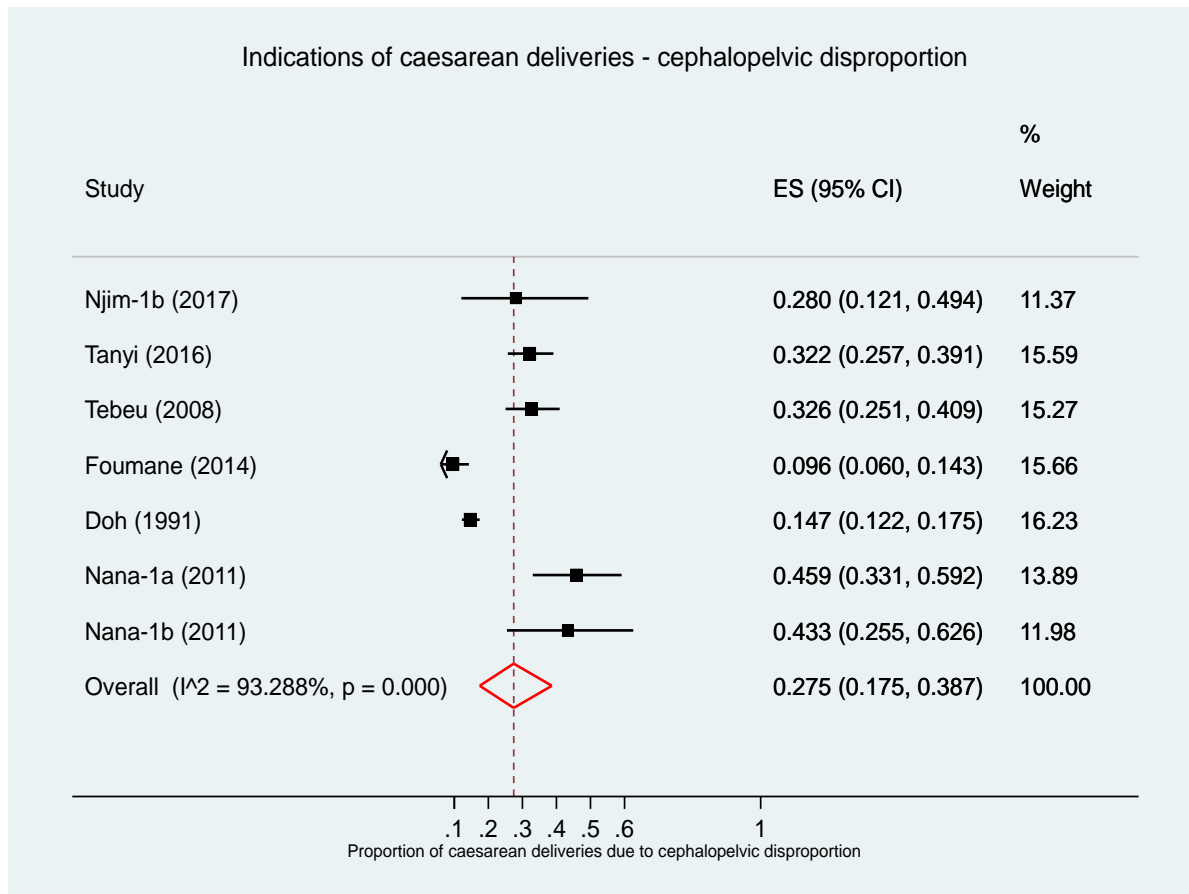

**Meta-analysis showing the proportion of caesarean deliveries due to a previous caesarean section**

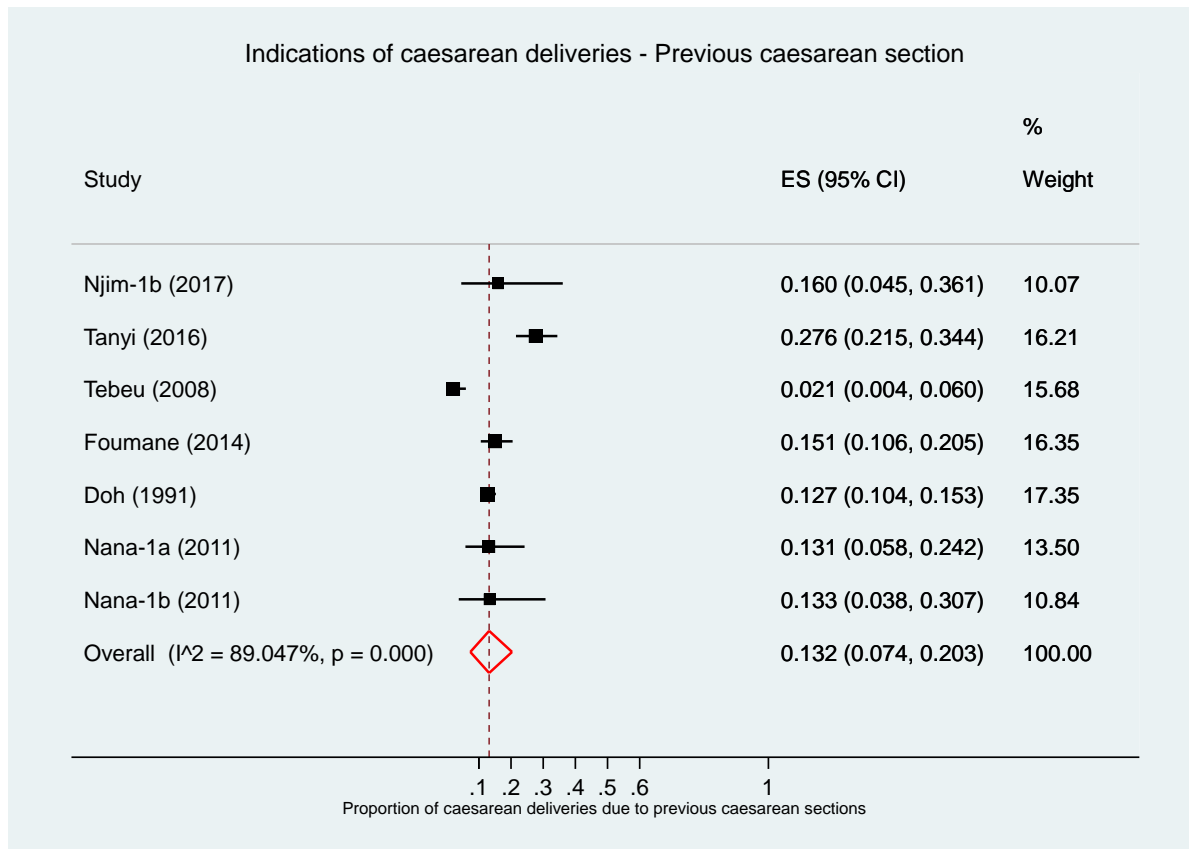

## Meta-analysis showing the proportion of caesarean deliveries due to foetal distress

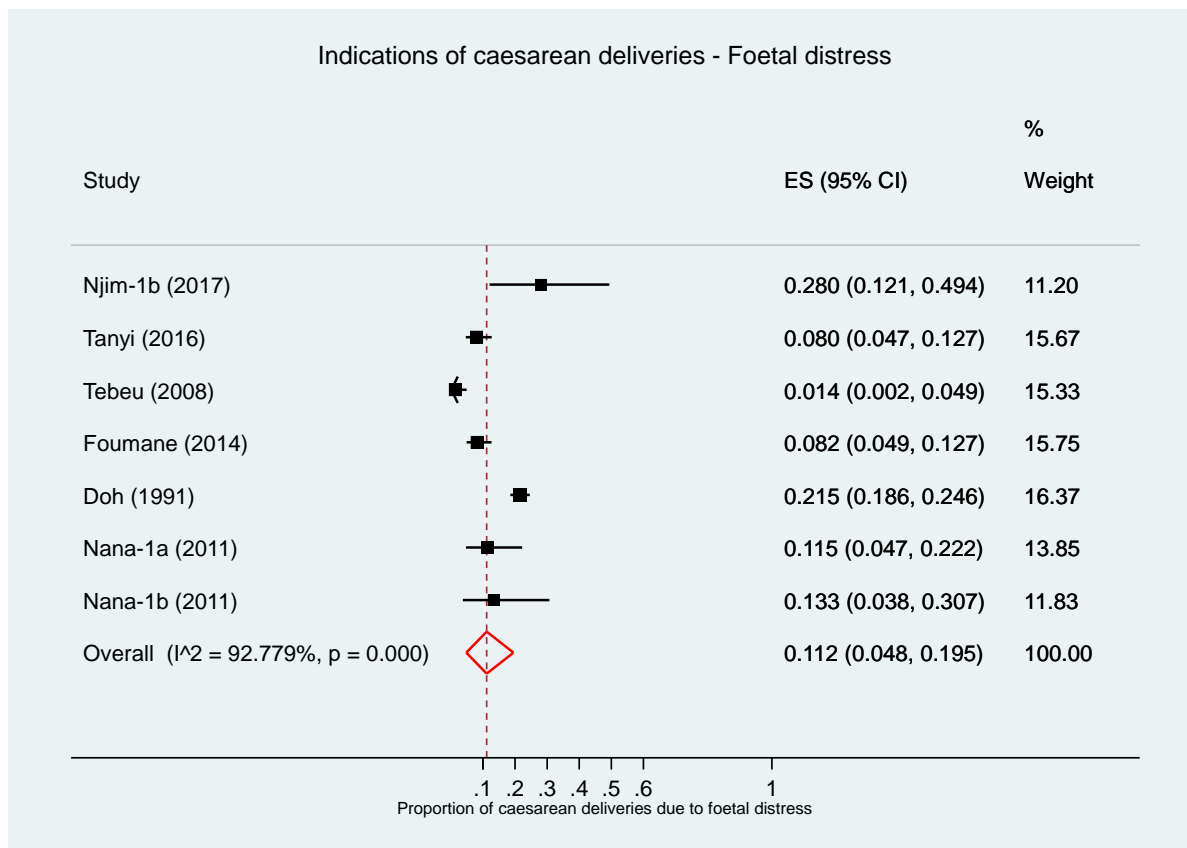

## Meta-analysis showing the proportion of caesarean deliveries due to malpresentation

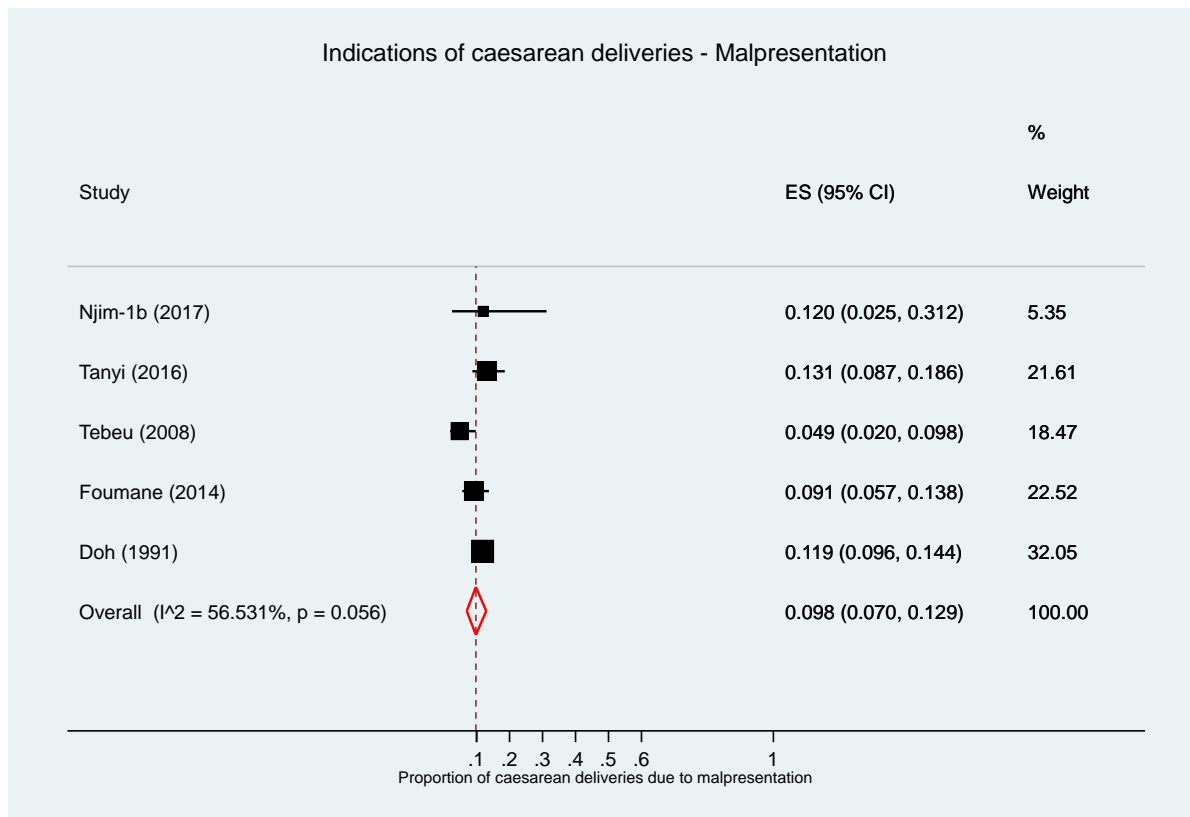

## Meta-analysis showing the proportion of caesarean deliveries due to antepartum haemorrhage

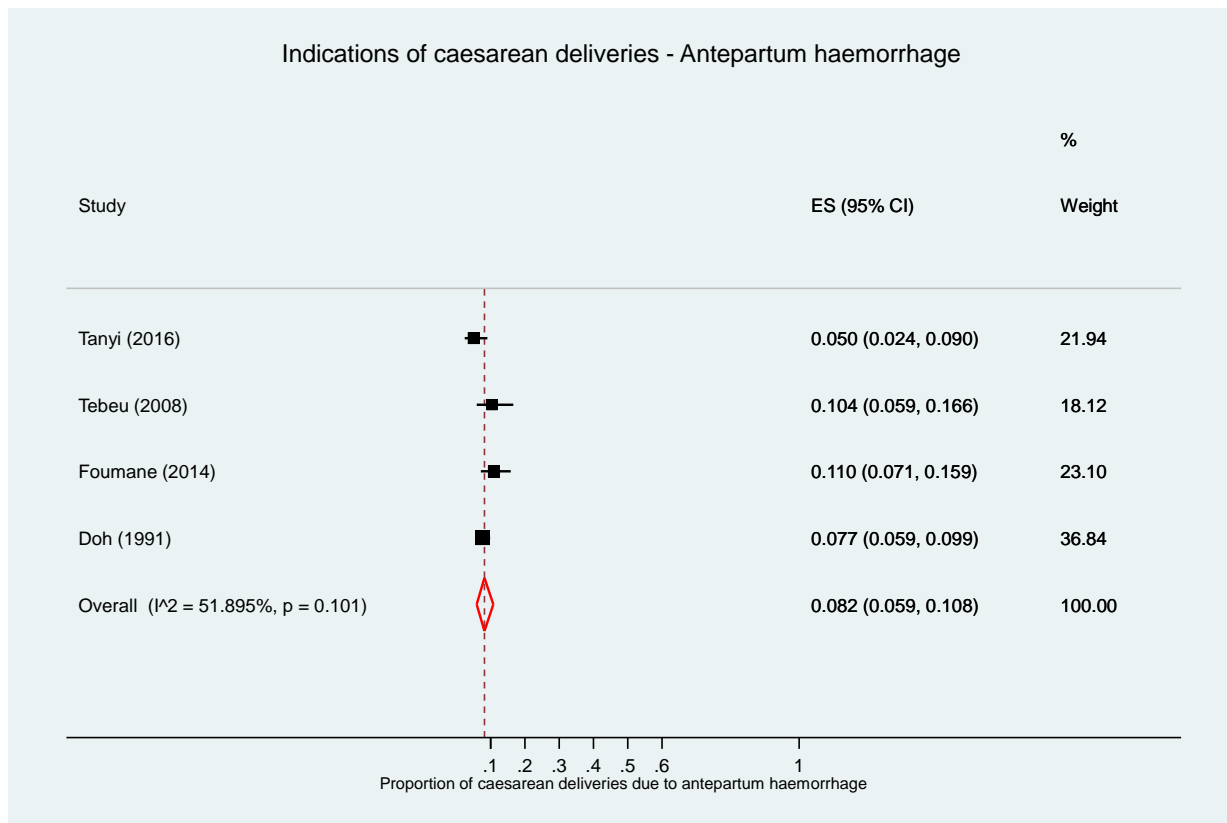

## Meta-analysis showing the proportion of caesarean deliveries due to dystocia

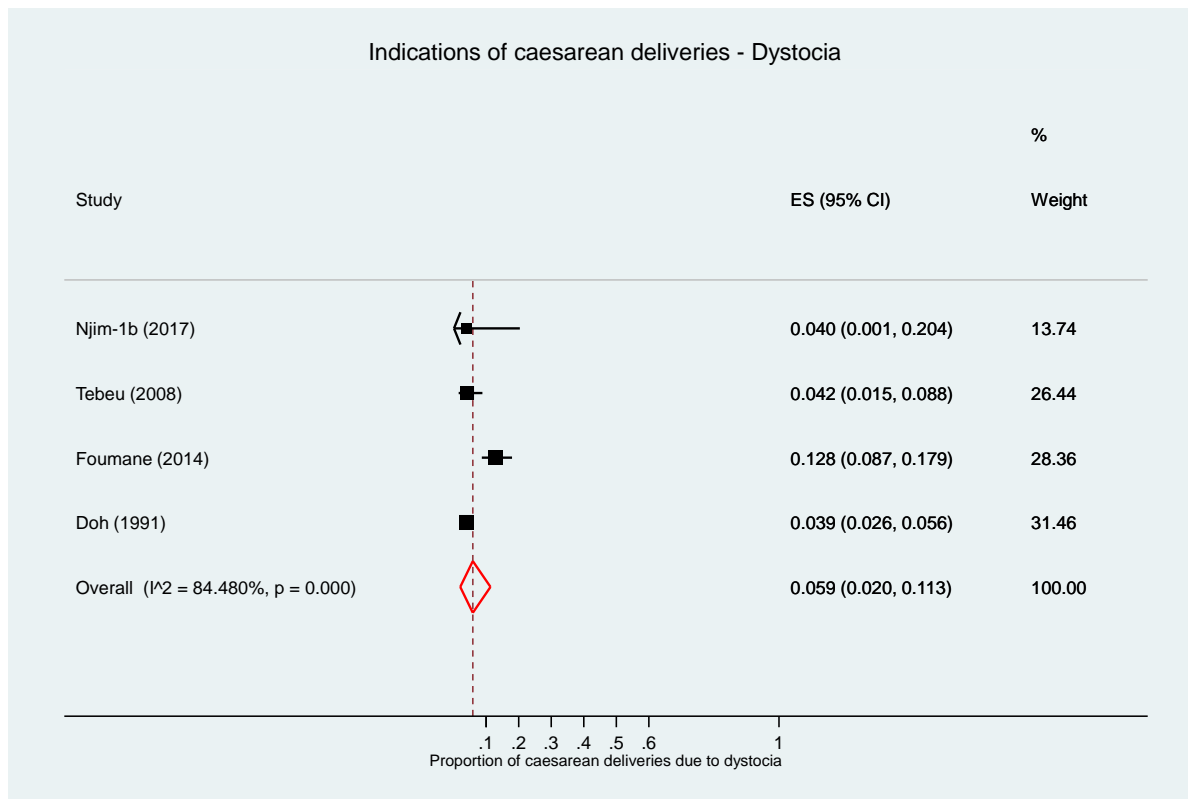

## Meta-analysis showing the proportion of caesarean deliveries due to multiple pregnancies

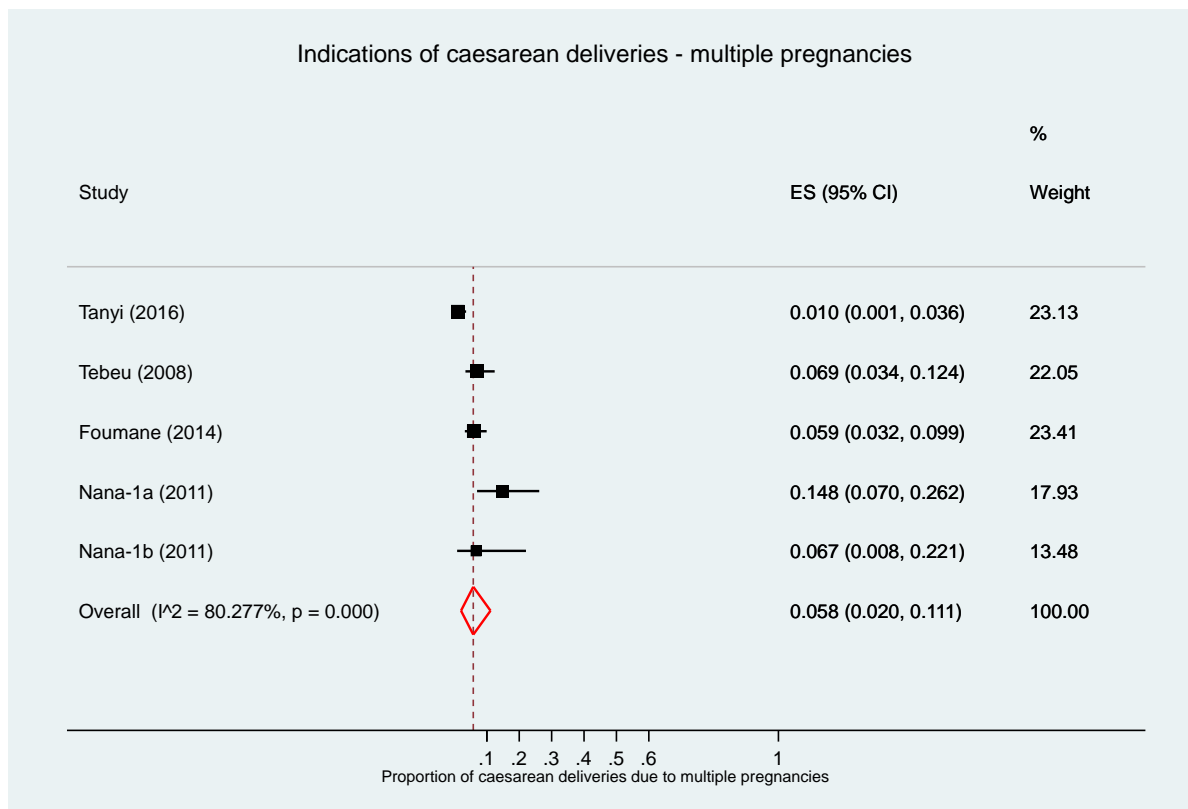

### Meta-analysis showing the proportion of caesarean deliveries due to cord prolapse

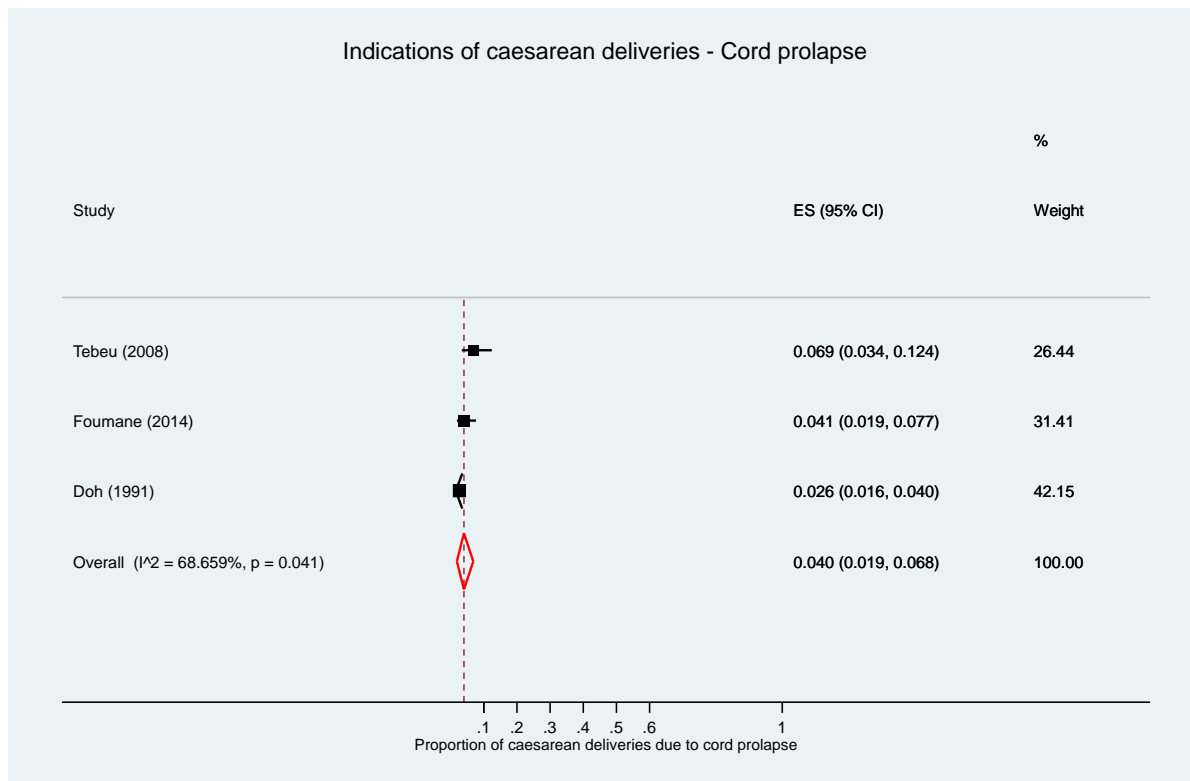

### Meta-analysis showing the proportion of caesarean deliveries due to hypertensive disorders in pregnancy

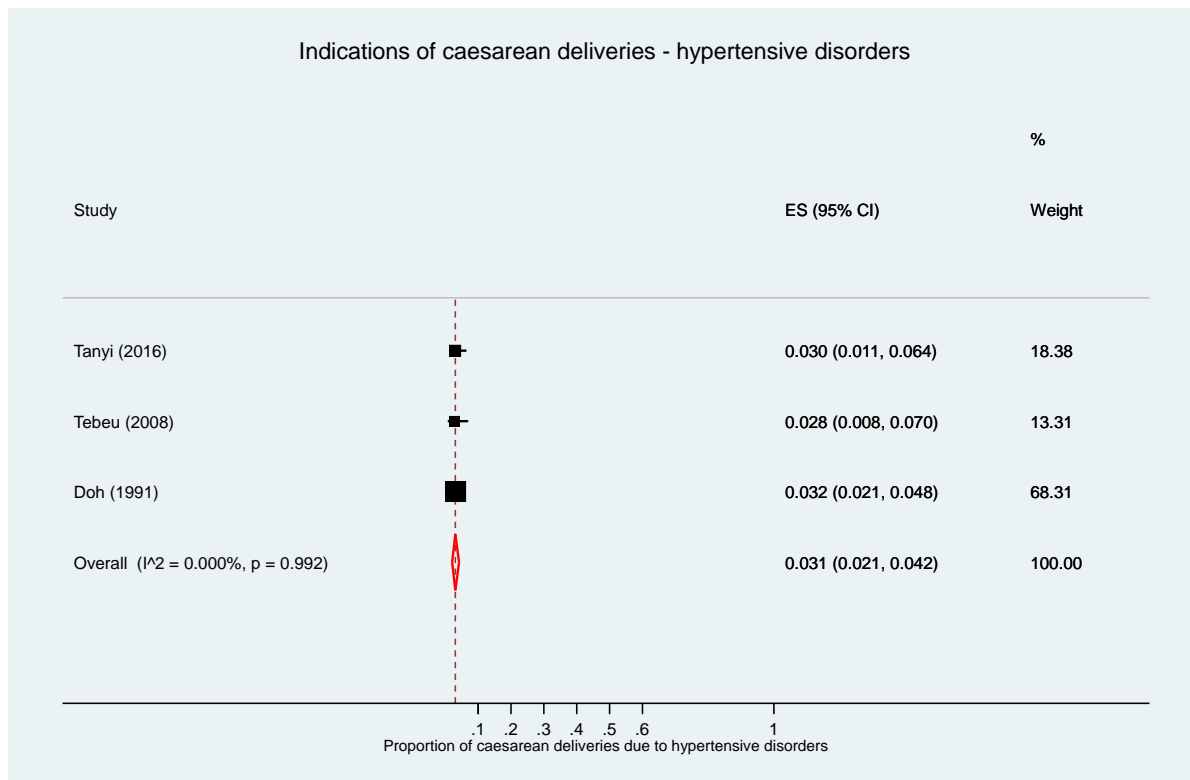

### Meta-analysis showing the proportion of caesarean deliveries due to macrosomia

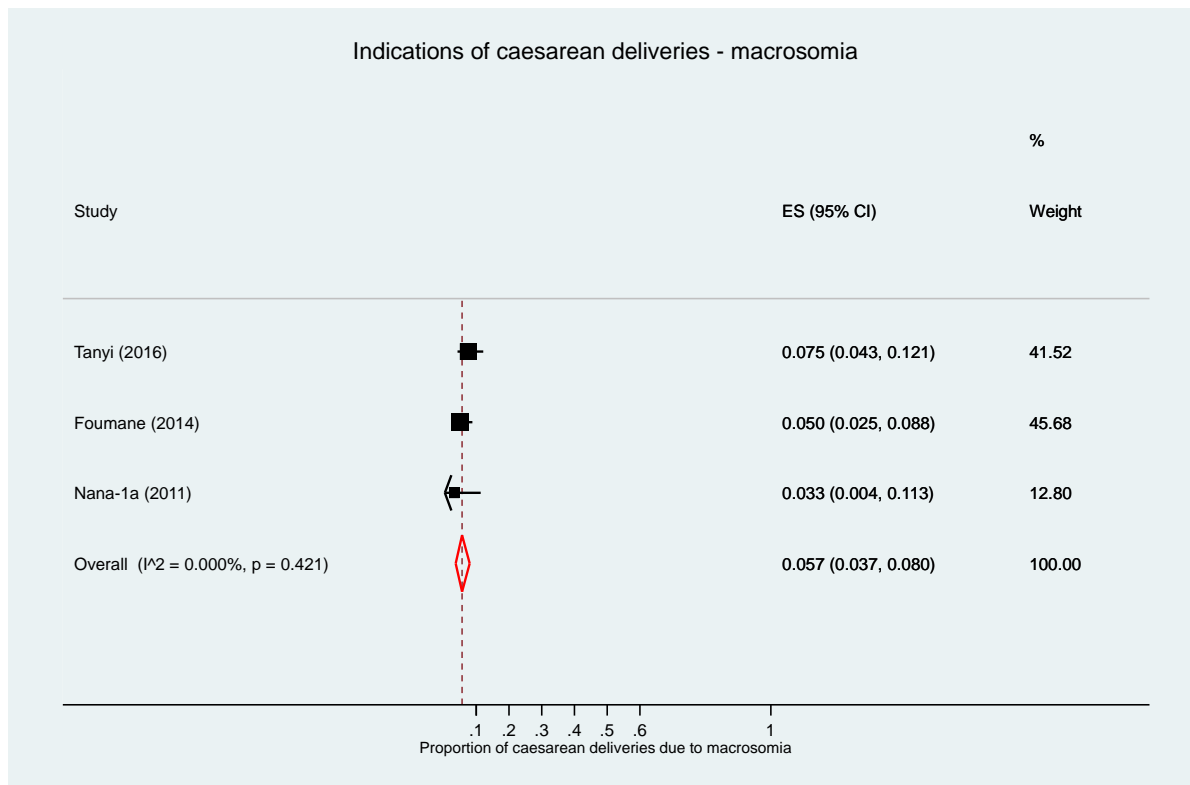

### Meta-analysis showing the proportion of caesarean deliveries due to uterine rupture

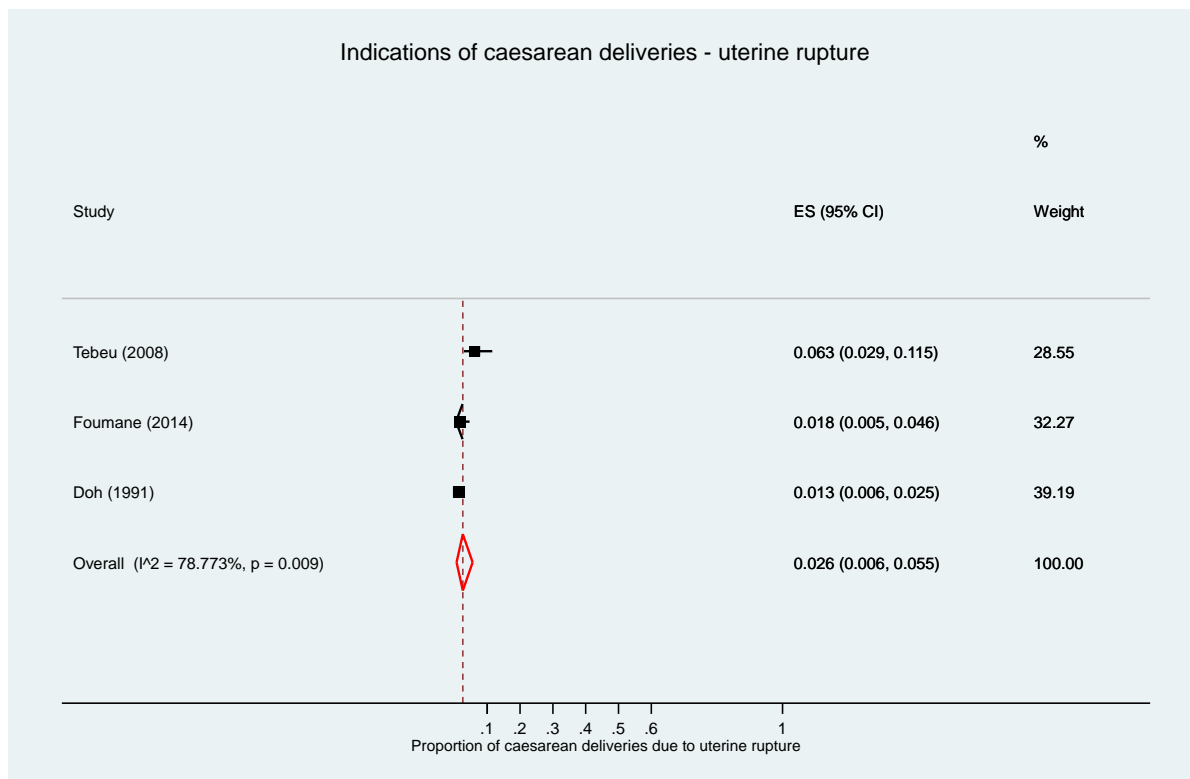

Supplement: 13690_2020_430_MOESM5_ESM.pdf [file 13690_2020_430_MOESM5_ESM.pdf]
