# Supplementary material for: Prevalence, indications and neonatal complications of caesarean deliveries in Cameroon: a systematic review and meta-analysis
Source: PubMed Central journal article supplement (PMC7268214; doi:10.1186/s13690-020-00430-1), 2020-06-03
Supplement: 13690_2020_430_MOESM2_ESM.pdf [file 13690_2020_430_MOESM2_ESM.pdf]

## Information sources

### *Electronic sources*

Online database: Medline was searched using the search strategy below from the date of creation of the database to 25/07/2019, for relevant abstracts of articles.

| Searches | Search combinations | Search terms                                                                                                                                              | Number of hits |
|----------|---------------------|-----------------------------------------------------------------------------------------------------------------------------------------------------------|----------------|
| S1       |                     | (MH "Cesarean Section+") OR (MH "Cesarean Section, Repeat")                                                                                               | 43,084         |
| S2       |                     | "caesarean section*" OR "cesarean section*" OR "caesarean deliver*" OR "cesarean deliver*" OR "operative deliver*" OR "abdominal deliver*" OR "C-section" | 68,777         |
| S3       | S1 OR S2            |                                                                                                                                                           | 68,777         |
| S4       |                     | "MH Cameroon+"                                                                                                                                            | 5,066          |
| S5       |                     | Cameroon                                                                                                                                                  | 9,912          |
| S6       | S4 OR S5            |                                                                                                                                                           | 9,912          |
| S7       | S3 AND S6           |                                                                                                                                                           | 71             |

Online database: CINAHL was searched using the search strategy below from the date of creation of the database to 25/07/2019, for relevant abstracts of articles.

| Searches | Search combinations | Search terms                                                                                                                                              | Number of hits |
|----------|---------------------|-----------------------------------------------------------------------------------------------------------------------------------------------------------|----------------|
| S1       |                     | (MH "Cesarean Section, Elective") OR (MH "Cesarean Section+") OR (MH "Cesarean Section, Repeat")                                                          | 16,189         |
| S2       |                     | "caesarean section*" OR "cesarean section*" OR "caesarean deliver*" OR "cesarean deliver*" OR "operative deliver*" OR "abdominal deliver*" OR "C-section" | 22,471         |
| S3       | S1 OR S2            |                                                                                                                                                           | 22,471         |
| S4       |                     | "MH Cameroon+"                                                                                                                                            | 1,025          |
| S5       |                     | Cameroon                                                                                                                                                  | 1,278          |
| S6       | S4 OR S5            |                                                                                                                                                           | 1,278          |

|    |           |  |    |
|----|-----------|--|----|
| S7 | S3 AND S6 |  | 13 |
|----|-----------|--|----|

Online database: Global health was searched using the search strategy below from the date of creation of the database to 25/07/2019, for relevant abstracts of articles.

| <b>Searches</b> | <b>Search combinations</b> | <b>Search terms</b>                                                                                                                                                 | <b>Number of hits</b> |
|-----------------|----------------------------|---------------------------------------------------------------------------------------------------------------------------------------------------------------------|-----------------------|
| S1              |                            | “caesarean section*” OR “cesarean section*” OR<br>“caesarean deliver*” OR “cesarean deliver*” OR<br>“operative deliver*” OR “abdominal deliver*” OR “C-<br>section” | 7,399                 |
| S2              |                            | Cameroon                                                                                                                                                            | 8,741                 |
| S3              | S1 AND S2                  |                                                                                                                                                                     | 39                    |
