# Supplementary material for: Prevalence, indications and neonatal complications of caesarean deliveries in Cameroon: a systematic review and meta-analysis
Source: PubMed Central journal article supplement (PMC7268214; doi:10.1186/s13690-020-00430-1), 2020-06-03

Meta-analysis showing the prevalence of caesarean deliveries in Cameroon over different time periods, taken from the period of recruitment of the participants – before the year 2000, 2000 – 2009 and 2010 – 2019.

## Caesarean Deliveries in Cameroon by various regions

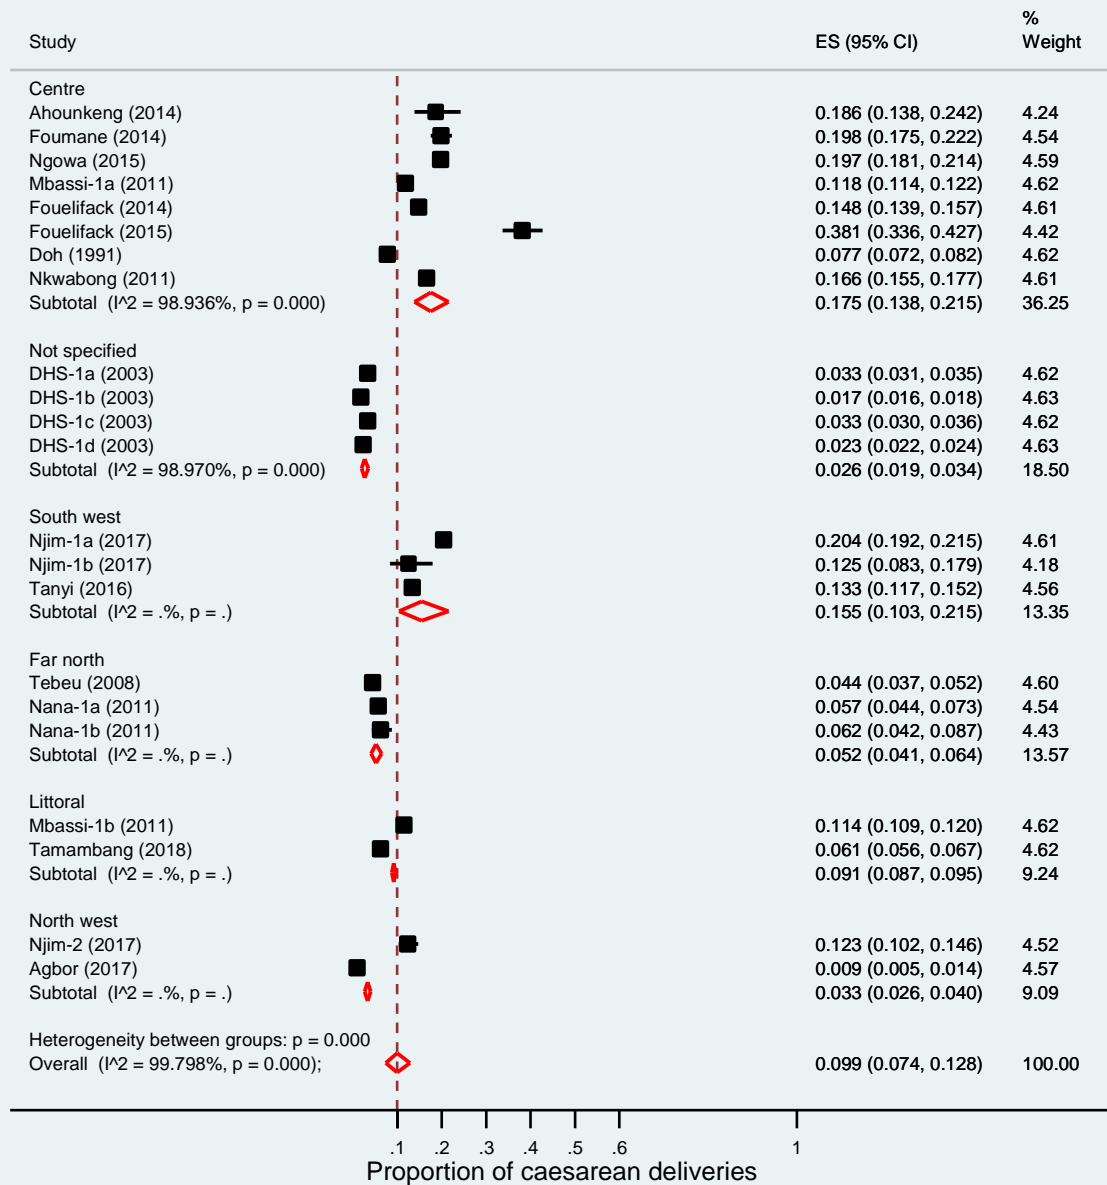

The study Njim-1a et al recruited participants from 2007 – 2012. As this fell between two time periods, it was placed in the time period 2010 – 2019 a majority (52.8%) of the participant recruitment occurred in this period.

**Meta-analysis showing the prevalence of caesarean deliveries in Cameroon in different settings – rural, urban and semi-urban.**

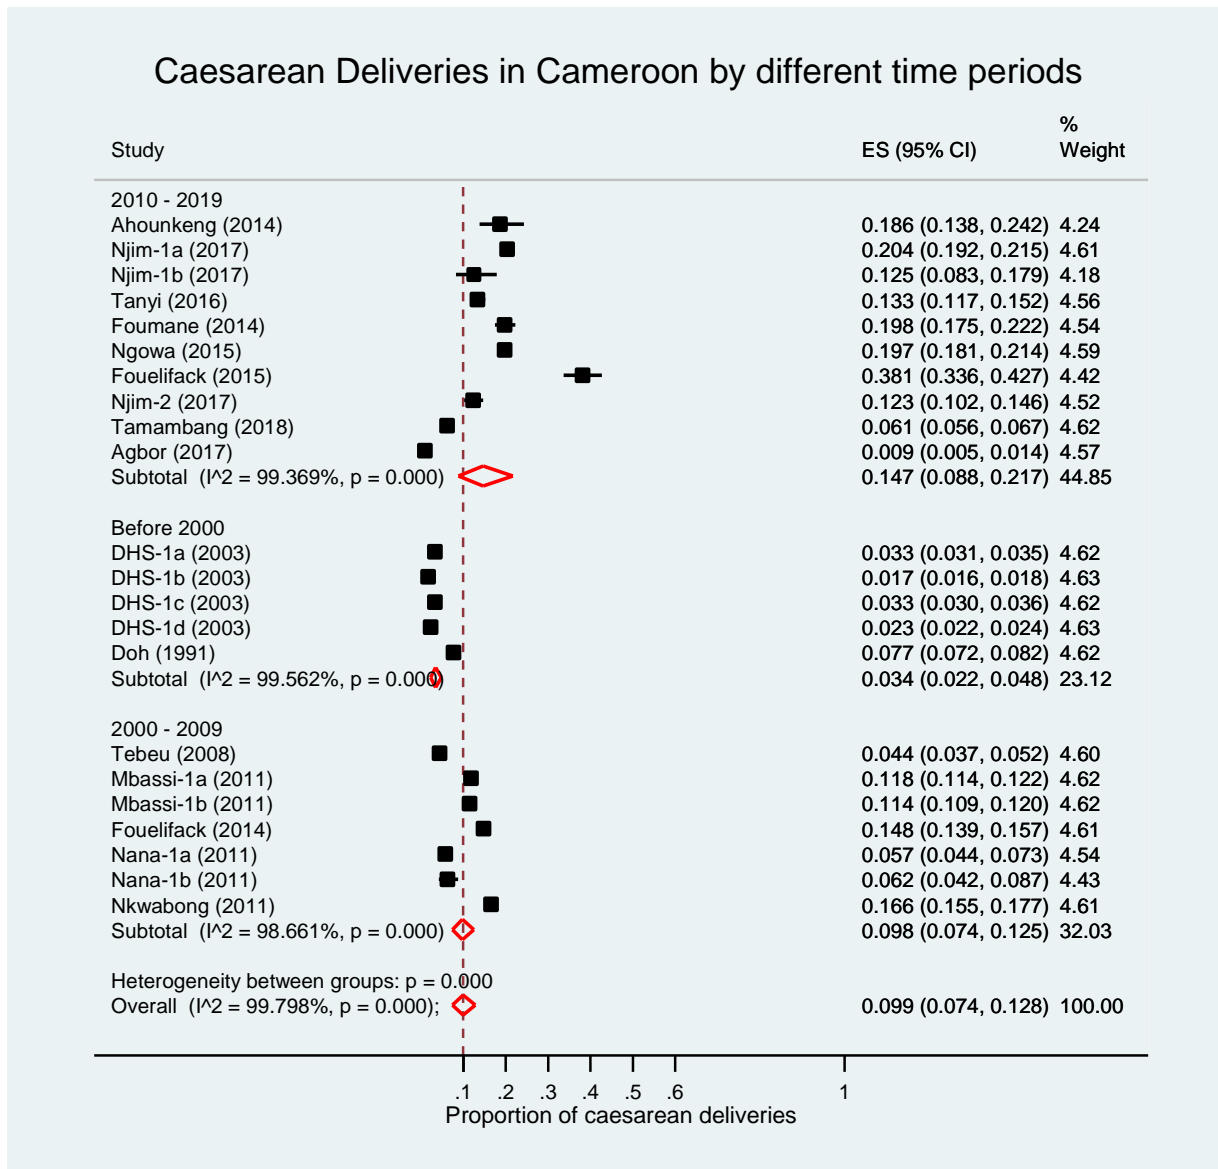

**Meta-analysis showing the prevalence of caesarean deliveries in Cameroon in different health facilities – primary, secondary and tertiary.**

## Caesarean Deliveries in Cameroon by settings

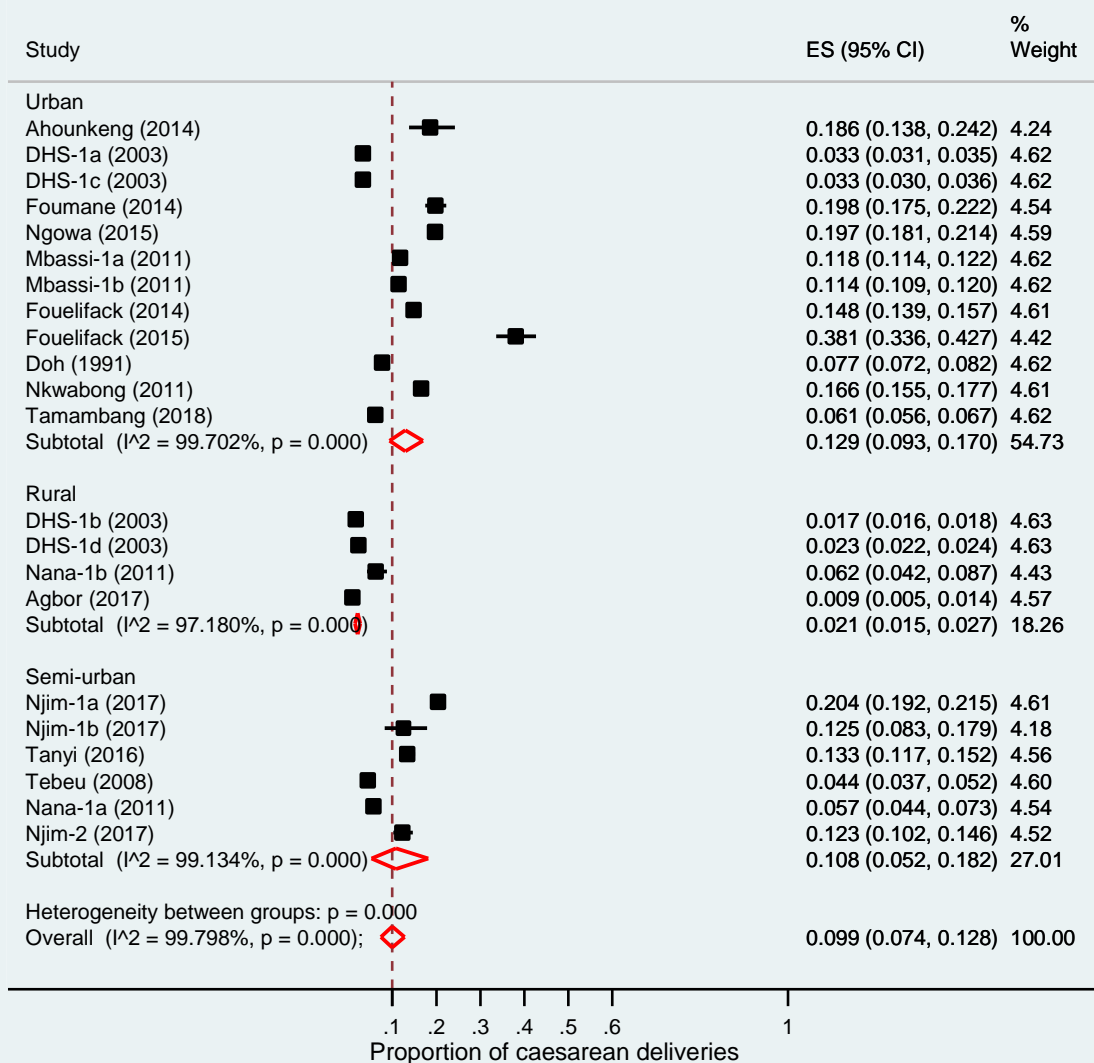

Supplement: 13690_2020_430_MOESM4_ESM.pdf [file 13690_2020_430_MOESM4_ESM.pdf]
