# Supplementary material for: Prevalence, indications and neonatal complications of caesarean deliveries in Cameroon: a systematic review and meta-analysis
Source: PubMed Central journal article supplement (PMC7268214; doi:10.1186/s13690-020-00430-1), 2020-06-03
Supplement: 13690_2020_430_MOESM6_ESM.pdf [file 13690_2020_430_MOESM6_ESM.pdf]

## Meta-analysis showing neonatal asphyxia as a complication of caesarean deliveries in Cameroon

Asphyxia defined as Apgar score of less than 7 in the first minute

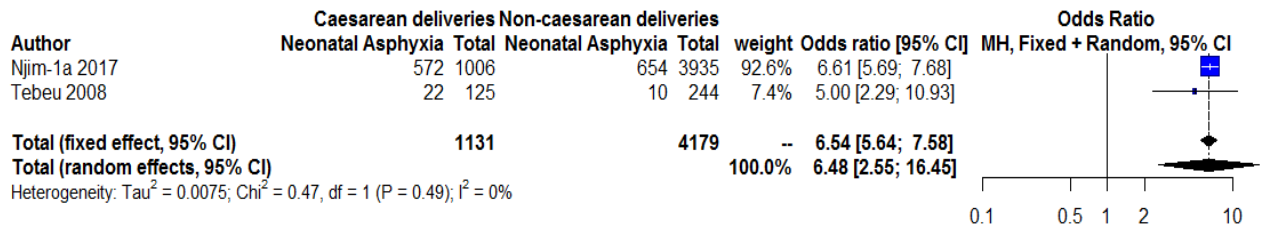

## Meta-analysis showing stillbirths as a complication of caesarean deliveries in Cameroon

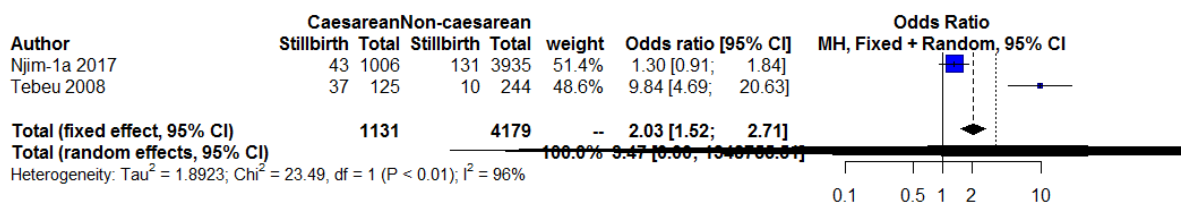

Odds ratio of Random effects model = 3.5

Confidence interval of random effects model: [0.0; 1348755.5]
